# Supplementary material for: Phytochrome B Mediates the Regulation of Chlorophyll Biosynthesis through Transcriptional Regulation of ChlH and GUN4 in Rice Seedlings
Source: PubMed Central journal article supplement (PMC4536196; doi:10.1371/journal.pone.0135408), 2015-08-13
Supplement: pone.0135408.s002.pdf [file pone.0135408.s002.pdf]

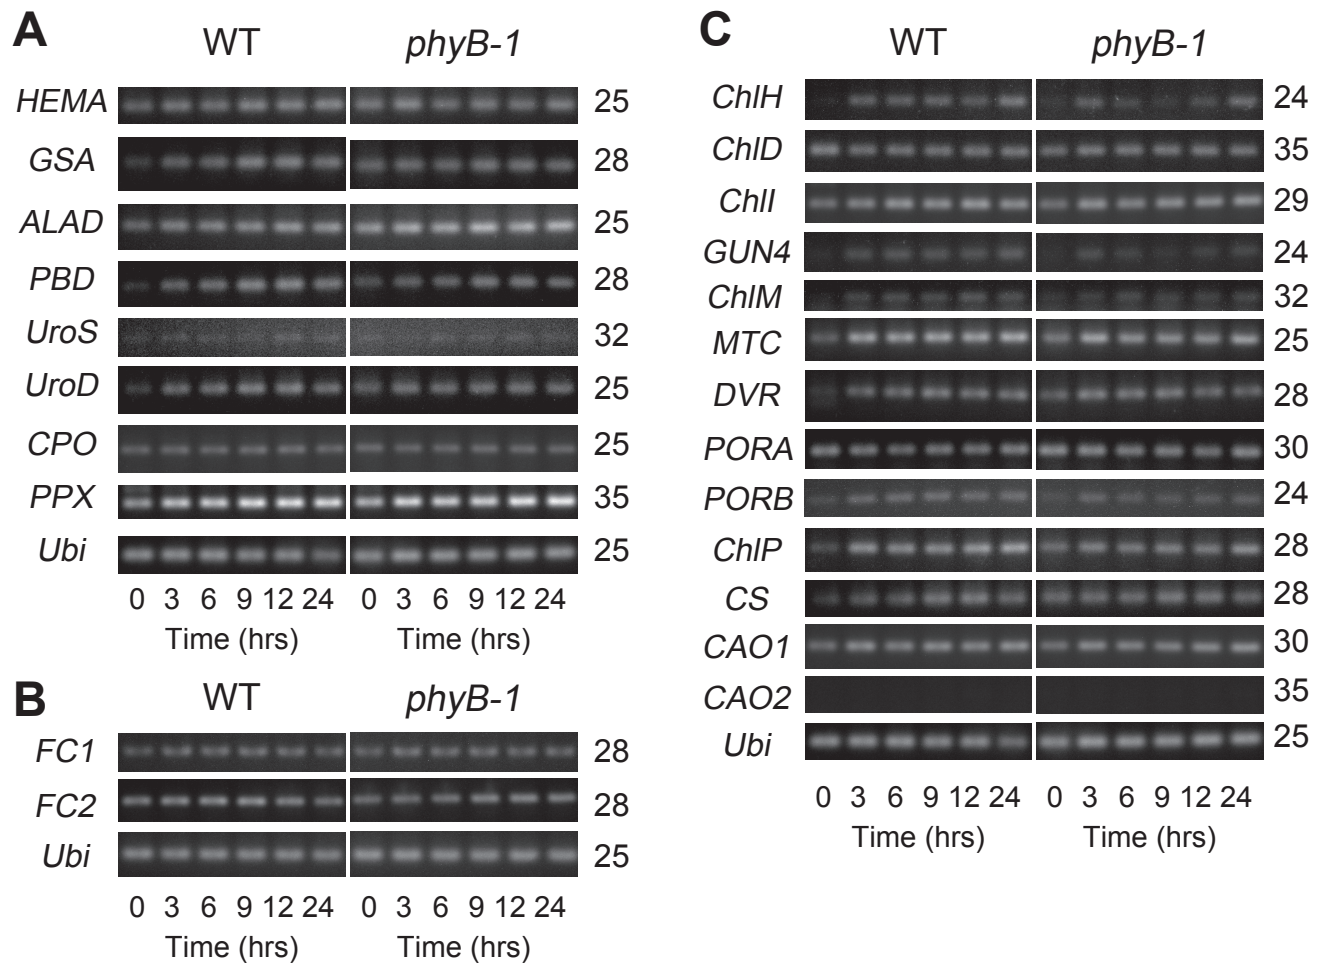

**S2 Fig. RT-PCR to detect transcripts involved in chlorophyll/heme biosynthesis pathway.** Representative gel images of RT-PCR for transcripts involved in chlorophyll/heme common pathway (A), heme branch (B) and chlorophyll branch (C) during the Rc-induced greening experiment. Numbers on right side of the columns represent cycles applied in PCR amplification.
