# Supplementary material for: Phytochrome B Mediates the Regulation of Chlorophyll Biosynthesis through Transcriptional Regulation of ChlH and GUN4 in Rice Seedlings
Source: PubMed Central journal article supplement (PMC4536196; doi:10.1371/journal.pone.0135408), 2015-08-13
Supplement: pone.0135408.s003.pdf [file pone.0135408.s003.pdf]

**S1 Table. Genes examined and PCR primer sequences used to amplify their transcripts.**

| Symbol                          | Common name                                                | RAP ID       | FW primer                       | RV primer                         | Ref. |
|---------------------------------|------------------------------------------------------------|--------------|---------------------------------|-----------------------------------|------|
| Chlorophyll/heme common pathway |                                                            |              |                                 |                                   |      |
| <i>HEMA</i>                     | Glutamyl-tRNA reductase (GluTR)                            | Os10g0502400 | 5'-CGTCGATGACTTGAAAGAGGT-3'     | 5'-GATTGTTTGGGCCTCCATT-3'         | 1    |
| <i>GSA</i>                      | Glutamate-1-semialdehyde 2,1-aminomutase                   | Os08g0532200 | 5'-GAAGTCCGAGGAGATCTTCAAC-3'    | 5'-GAAGGCACGAACTGGTGAAT-3'        | 1    |
| <i>ALAD</i>                     | 5-aminolevulinic acid dehydrogenase                        | Os06g0704600 | 5'-ATTGCCAATCGCTGCATATC-3'      | 5'-CCATCATCACCTTCTCTTCGT-3'       | 1    |
| <i>PBD</i>                      | Porphobilinogen deaminase                                  | Os02g0168800 | 5'-GCCAAGGTCTCGCTCATC-3'        | 5'-CCCTCCTCGGCTAACTCTG-3'         | 1    |
| <i>UroS</i>                     | Uroporphyrinogen-III synthase                              | Os03g0186100 | 5'-GAGGTTTCATAGCGTGCTCCT-3'     | 5'-CAAGACTTTGTACATTATGTTTTTCCA-3' | 1    |
| <i>UroD</i>                     | Uroporphyrinogen-III decarboxylase                         | Os03g0337600 | 5'-TGCTGTGAATGAGGTCAGAGA-3'     | 5'-ACACGGCAGCTTCATTGTTA-3'        | 1    |
| <i>CPO</i>                      | Coproporphyrinogen oxidase                                 | Os04g0610800 | 5'-TTGAGACAGATGCACCGAAA-3'      | 5'-CACACGCTTGTTTTTGAACAG-3'       | 1    |
| <i>PPX</i>                      | Proporphyrinogen oxidase                                   | Os01g0286600 | 5'-TGGGAGGAGGGGCCCAACAGCTTCC-3' | 5'-CCACAGCACGAACCGCGGCGGTTG-3'    | 2    |
| Heme branch                     |                                                            |              |                                 |                                   |      |
| <i>FC1</i>                      | Ferrochelatase                                             | Os09g0297000 | 5'-GGTCAACAGGGTGTAAGAG-3'       | 5'-GTGCATCCAAGAGCTGGAAC-3'        | 2    |
| <i>FC2</i>                      | Ferrochelatase                                             | Os05g0361200 | 5'-CTTGCCTTATGTTGGTGCTA-3'      | 5'-AGCCCCACTCCCATACAGTC-3'        | 2    |
| Chlorophyll branch              |                                                            |              |                                 |                                   |      |
| <i>ChlH</i>                     | Magnesium chelatase (MgCh) H subunit                       | Os03g0323200 | 5'-CCAATCCGTAACCCGAAGGT-3'      | 5'-CAATAATTTTGGCGCTCTTCAA-3'      | 2    |
| <i>ChlD</i>                     | MgCh D subunit                                             | Os03g0811100 | 5'-CCAACGGGGCCATCCCCTCGGGAA-3'  | 5'-TTGCCCAAGCAGCAGAGCAGTTTTT-3'   | 2    |
| <i>ChlI</i>                     | MgCh I subunit                                             | Os03g0563300 | 5'-CCCGCCGCGTCGCCGGCCCTCTTCT-3' | 5'-CGGCGGAACCCTCTCCGTGACGGGA-3'   | 2    |
| <i>GUN4</i>                     | Genome uncoupled 4                                         | Os11g0267000 | 5'-GCAGCAGAGGAGAATGACACACCTG-3' | 5'-GTAGTCAGGCTTGAAGAAATCTCTC-3'   | 2    |
| <i>ChlM</i>                     | Mg-Proto IX methyltransferase (MgMT)                       | Os06g0132400 | 5'-TCGACGTGCTGATCCACTAC-3'      | 5'-TGATGAGCACCCGCTTCT-3'          | 1    |
| <i>MTC</i>                      | Mg-Proto IX monomethylester cyclase                        | Os01g0279100 | 5'-CCGACAGGCTCAAGAAAAC-3'       | 5'-ATCAGACAGCCCCTTGTTCA-3'        | 1    |
| <i>DVR</i>                      | 3,8-divinyl protochlorophyllide <i>a</i> 8-vinyl reductase | Os03g0351200 | 5'-CCATTGCCAGTTTCTTGGTG-3'      | 5'-AATTGAATGGCTAATGGCGT-3'        | 2    |
| <i>PORA</i>                     | Protochlorophyllide oxidoreductase (POR)                   | Os04g0678700 | 5'-AAGTGGCAGCTGGTGATG-3'        | 5'-AGGTGCATGACGGTGTAGC-3'         | 1    |
| <i>PORB</i>                     | Protochlorophyllide oxidoreductase (POR)                   | Os10g0496900 | 5'-GATGGAGGAGAATTTGTAGG-3'      | 5'-ATGATCCACCAGTGAACAAC-3'        | 2    |
| <i>ChlP</i>                     | Geranylgeranyl-diphosphate reductase                       | Os02g0744900 | 5'-ATCCCCGACGACAAGATG-3'        | 5'-GTCGCACTTGGGGAACAC-3'          | 1    |
| <i>CS</i>                       | Chlorophyll synthase                                       | Os05g0349700 | 5'-AGGCTCCAGCTTCAACCAG-3'       | 5'-GGCGAATCTCCATATGTCG-3'         | 1    |
| <i>CAO1</i>                     | Chlorophyll <i>a</i> oxygenase                             | Os10g0567400 | 5'-TGCTCATCAAGCCTTCTTTCAGGTG-3' | 5'-GCGTTGTTCTTTGCATAGTCAGCTC-3'   | 2    |
| <i>CAO2</i>                     | Chlorophyll <i>a</i> oxygenase                             | Os10g0567100 | 5'-CTGCTCGTCAAGCCTTCTCTCTCT-3'  | 5'-CCCTCATGTTGTTCTTGGCATGTTG-3'   | 2    |
| Control                         |                                                            |              |                                 |                                   |      |
| <i>Ubi</i>                      | Ubiquitin                                                  | Os02g0161900 | 5'-GAGCCTCTGTTCGTCAGTA-3'       | 5'-ACTCGATGGTCCATTAAACC-3'        | 2    |

1 H. Nakamura and H. Ichikawa, personal communication

2 in this work
