# Supplementary material for: Phytochrome B Mediates the Regulation of Chlorophyll Biosynthesis through Transcriptional Regulation of ChlH and GUN4 in Rice Seedlings
Source: PubMed Central journal article supplement (PMC4536196; doi:10.1371/journal.pone.0135408), 2015-08-13
Supplement: pone.0135408.s004.pdf [file pone.0135408.s004.pdf]

**S2 Table. Electron transport activities of photosystem I and II in thylakoid membranes isolated from the WT and *phyB-1* seedlings grown under Rc irradiation for 9 days.**

| Photosystem II activity<br>( $\mu\text{mol e}^- \text{ mg Chl}^{-1} \text{ h}^{-1}$ ) |                  | Photosystem I activity<br>( $\mu\text{mol e}^- \text{ mg Chl}^{-1} \text{ h}^{-1}$ ) |                 |
|---------------------------------------------------------------------------------------|------------------|--------------------------------------------------------------------------------------|-----------------|
| WT                                                                                    | <i>phyB-1</i>    | WT                                                                                   | <i>phyB-1</i>   |
| 487.3 $\pm$ 51.1                                                                      | 461.9 $\pm$ 29.4 | 279.2 $\pm$ 14.3                                                                     | 242.4 $\pm$ 7.6 |

Each value is the mean of data from 4 samples with their SD.

## Procedures

### Isolation of thylakoid membranes

Seedlings grown under Rc irradiation for 9 days were harvested, weighed and ground in 8-fold volume of 50 mM Tris HCl buffer (pH 7.5) containing 0.1 M sucrose, 10 mM NaCl, 2.5 mM MgCl<sub>2</sub> and 10 mM sodium ascorbate by a Waring blender. The homogenate was filtered through two layers of cheesecloth and centrifuged at 300  $\times g$  for 30 sec. The supernatant was further centrifuged at 20,000  $\times g$  for 7 min. The precipitate was resuspended with the same buffer and then centrifuged at 20,000  $\times g$  for 7 min. Crude thylakoid was obtained as the resultant precipitate, which was suspended into small volume of a measuring buffer, 50 mM Mes-NaOH (pH 6.5) containing 0.1M sucrose, 10 mM NaCl and 5 mM MgCl<sub>2</sub>.

### Measurement of PSII activity

Photosynthetic electron transport activity of PSII was estimated from photosynthetic oxygen evolution rate measured by a Clark-type oxygen electrode (Rank Brothers Ltd). Ten  $\mu\text{g}$  chlorophyll  $\text{ml}^{-1}$  of thylakoid in the measuring buffer in a glass chamber with the electrode was irradiated by saturating actinic light from a halogen lamp in the presence of 0.8 mM 2,6-dichlorobenzoquinone (DCBQ) and 1 mM potassium ferricyanide.

### **Measurement of PSI activity**

Photosynthetic electron transport activity of PSI was estimated from decrease of oxygen molecules by re-oxidation of photosynthetically reduced methyl viologen (MV) measured by a Clark-type oxygen electrode (Rank Brothers Ltd). Four  $\mu\text{g}$  chlorophyll  $\text{ml}^{-1}$  of thylakoid in the measuring buffer was exposed to a saturating actinic light in the electrode chamber in the presence of 1 mM KCN, 0.07 mM reduced 2,6-dichloroindophenol (DCIP), 0.1 mM MV, 0.01 mM 3-(3,4-Dichlorophenyl)-1,1-dimethylurea (DCMU) and 0.01 mM carbonylcyanide-3-chlorophenylhydrazone (CCCP).
